# Supplementary material for: Omics of endothelial cell dysfunction in sepsis
Source: PubMed Central journal article supplement — Vasc Biol. 2022 Apr 7;4(1):R15–34. doi: 10.1530/VB-22-0003 (PMC9066943; doi:10.1530/vb-22-0003), 2022-04-07
Supplement: supplementary_table_2.pdf [file supplementary_table_2.pdf]

**Table S2:** Definitions for each of the genes listed in Table 2. More detail on the functionality of these genes can be found at <https://www.genecards.org>, <https://www.ncbi.nlm.nih.gov> or <https://www.uniprot.org>.

| Genes Upregulated/Downregulated                                                                                                                      | Gene Name                                                                   | Reference |
|------------------------------------------------------------------------------------------------------------------------------------------------------|-----------------------------------------------------------------------------|-----------|
| <b>AT upregulated genes:</b> <i>Csf2rb</i> , <i>Cldn15</i> , <i>Acox1</i> , <i>da</i> , <i>Papss2</i>                                                | <i>Csf2rb</i> - Colony stimulating factor 2 receptor subunit beta           | (54)      |
| <b>Brain upregulated genes:</b> <i>Slco1c1</i> , <i>Slco1a4</i> , <i>Slc22a8</i> , <i>Mfsd2a</i> , <i>Stra6</i>                                      | <i>Cldn15</i> – Claudin 15                                                  |           |
| <b>Diaphragm upregulated genes:</b> <i>Gm12216</i> , <i>Adamts4</i> , <i>Sphk1</i> , <i>Prkcc</i>                                                    | <i>Acox1</i> – Acyl-CoA oxidase 1                                           |           |
| <b>Heart upregulated genes:</b> <i>Ccnd1</i> , <i>Ctnnbip1</i> , <i>Plcb4</i> , <i>Myadm</i> , <i>Slc28a2</i>                                        | <i>Papss2</i> – 3'-phosphoadenose 5'-phosphosulfate synthase 2              |           |
| <b>Liver upregulated genes:</b> <i>Clec4g</i> , <i>Fcgr2b</i> , <i>Stab2</i> , <i>Mrc1</i> , <i>Plxnc1</i> , <i>Apc</i> , <i>Lrp6</i> , <i>Ep300</i> | <i>Slco1c1</i> – Solute carrier organic anion transporter family member 1C1 |           |
| <b>Lung upregulated genes:</b> <i>Tmem100</i> , <i>Scn7a</i> , <i>Adrb1</i> , <i>Daam1</i> , <i>Nkd1</i>                                             | <i>Slco1a4</i> - Solute carrier organic anion transporter family member 1A4 |           |
| <b>MG upregulated genes:</b> <i>Emp1</i> , <i>Atf4</i> , <i>Dusp5</i> , <i>Gadd45b</i> , <i>Myc</i> , <i>Relb</i>                                    | <i>Slc22a8</i> – Solute carrier family 22 member 8                          |           |
| <b>Pancreas upregulated genes:</b> <i>Fgfr1</i> , <i>Ntf3</i> , <i>Pla2g1</i> , <i>Cele2a</i> , <i>Prss2</i>                                         | <i>Mfsd2a</i> – Major facilitator superfamily domain containing 2A          |           |
| <b>SM upregulated genes:</b> <i>Csf1</i> , <i>Cxcl</i> , <i>Cxcl10</i> , <i>Cxcl2</i> , <i>Osmr</i>                                                  | <i>Stra6</i> – Signaling receptor and transporter of retinol 6              |           |
| <b>Trachea upregulated genes:</b> <i>Rgs16</i> , <i>Coll3a1</i> , <i>Stc1</i> , <i>Psd</i> , <i>Nr4a2</i> , <i>Bhihe40</i>                           | <i>Gm12216</i> – Predicted gene 12216                                       |           |
|                                                                                                                                                      | <i>Adamts4</i> – ADAM metalloproteinase with thrombospondin type 1 motif 4  |           |
|                                                                                                                                                      | <i>Sphk1</i> – Sphingosine kinase 1                                         |           |
|                                                                                                                                                      | <i>Ccnd1</i> – Cyclin D1                                                    |           |
|                                                                                                                                                      | <i>Ctnnbip1</i> – Catenin beta interacting protein 1                        |           |
|                                                                                                                                                      | <i>Plcb4</i> – Phospholipase C beta 4                                       |           |
|                                                                                                                                                      | <i>Myadm</i> – Myeloid associated differentiation marker                    |           |
|                                                                                                                                                      | <i>Slc28a2</i> – Solute carrier family 28 member 2                          |           |
|                                                                                                                                                      | <i>Clec4g</i> – C-type lectin domain family 4 member G                      |           |
|                                                                                                                                                      | <i>Fcgr2b</i> – Fc gamma receptor IIb                                       |           |
|                                                                                                                                                      | <i>Stab2</i> – Stabilin 2                                                   |           |
|                                                                                                                                                      | <i>Mrc1</i> – Mannose receptor C-type 1                                     |           |

|  |                                                                                                                                                                                                                                                                                                                                                                                                                                                                                                                                                                                                                                                                                                                                                                                                                                                                                                                                                                                                                                                                                                                                                                                                                                                                            |  |
|--|----------------------------------------------------------------------------------------------------------------------------------------------------------------------------------------------------------------------------------------------------------------------------------------------------------------------------------------------------------------------------------------------------------------------------------------------------------------------------------------------------------------------------------------------------------------------------------------------------------------------------------------------------------------------------------------------------------------------------------------------------------------------------------------------------------------------------------------------------------------------------------------------------------------------------------------------------------------------------------------------------------------------------------------------------------------------------------------------------------------------------------------------------------------------------------------------------------------------------------------------------------------------------|--|
|  | <p><i>Plxnc1</i> – Plexin C1</p> <p><i>Apc</i> – APC regulator of WNT signaling pathway</p> <p><i>Lrp6</i> – LDL receptor related protein 6</p> <p><i>Ep300</i> – E1A binding protein p300</p> <p><i>Tmem100</i> – Transmembrane protein 100</p> <p><i>Scn7a</i> – Sodium voltage-gated channel alpha subunit 7</p> <p><i>Adrb1</i> – Adrenoceptor beta 1</p> <p><i>Daam1</i> – Dishevelled associated activator of morphogenesis 1</p> <p><i>Nkd1</i> – NKD inhibitor of WNT signaling pathway 1</p> <p><i>Emp1</i> – Epithelial membrane protein 1</p> <p><i>Atf4</i> – Activating transcription factor 4</p> <p><i>Dusp5</i> – Dual specificity phosphatase 5</p> <p><i>Gadd45b</i> – Growth arrest and DNA damage inducible beta</p> <p><i>Myc</i> – Myc proto-oncogene, bHLH transcription factor</p> <p><i>Relb</i> – RELB proto-oncogene, NF-kB subunit</p> <p><i>Fgfr1</i> – Fibroblast growth factor receptor 1</p> <p><i>Ntf3</i> – Neurotrophin 3</p> <p><i>Prss2</i> – Serine protease 2</p> <p><i>Csf1</i> – Colony stimulating factor 1</p> <p><i>Cxcl10</i> – C-X-C motif chemokine ligand 10</p> <p><i>Cxcl2</i> – C-X-C motif chemokine ligand 2</p> <p><i>Osmr</i> – Oncostatin M receptor</p> <p><i>Rgs16</i> – Regulator of G protein signaling 16</p> |  |
|--|----------------------------------------------------------------------------------------------------------------------------------------------------------------------------------------------------------------------------------------------------------------------------------------------------------------------------------------------------------------------------------------------------------------------------------------------------------------------------------------------------------------------------------------------------------------------------------------------------------------------------------------------------------------------------------------------------------------------------------------------------------------------------------------------------------------------------------------------------------------------------------------------------------------------------------------------------------------------------------------------------------------------------------------------------------------------------------------------------------------------------------------------------------------------------------------------------------------------------------------------------------------------------|--|

|                                                                                                                                                                                                                                                                                                                                                                                                                                                                                                       |                                                                                                                                                                                                                                                                                                                                                                                                                                                                                                                                                                                                                                                                                                                                                                                                                                                                                                                                |             |
|-------------------------------------------------------------------------------------------------------------------------------------------------------------------------------------------------------------------------------------------------------------------------------------------------------------------------------------------------------------------------------------------------------------------------------------------------------------------------------------------------------|--------------------------------------------------------------------------------------------------------------------------------------------------------------------------------------------------------------------------------------------------------------------------------------------------------------------------------------------------------------------------------------------------------------------------------------------------------------------------------------------------------------------------------------------------------------------------------------------------------------------------------------------------------------------------------------------------------------------------------------------------------------------------------------------------------------------------------------------------------------------------------------------------------------------------------|-------------|
|                                                                                                                                                                                                                                                                                                                                                                                                                                                                                                       | <p>Col13a1 – Collagen type XIII alpha 1 chain</p> <p><i>Stc1</i> – Stanniocalcin 1</p> <p><i>Psd</i> – Pleckstrin and Sec domain containing</p> <p><i>Nr4a2</i> – Nuclear receptor subfamily 4 group A member 2</p>                                                                                                                                                                                                                                                                                                                                                                                                                                                                                                                                                                                                                                                                                                            |             |
| <p><b>Brain upregulated genes:</b> <i>Ccl11, Timp1, Tnfa, Il1a, Ilb, Sele, Selp</i></p> <p><b>Lung upregulated genes:</b> <i>Cxcl1, Cxcl9, Ilr2, Casp6, Il10, Ly96</i></p> <p><b>Heart upregulated genes:</b> <i>Ccl3, Sele, Selp, Cxcl55, Cxcl1, Il6, Cxcl3</i></p> <p><b>Brain upregulated genes:</b> <i>Ccl3, Timp1, Ccl11, Selp, Sele</i></p> <p><b>Lung upregulated genes:</b> <i>Mmp8, Il10, Acod1, Cxcl9</i></p> <p><b>Heart upregulated genes:</b> <i>Cxcl5, Cxcl3, Selp, Sele, Acod1</i></p> | <p><i>Ccl11</i> – C-C motif chemokine ligand 11</p> <p><i>Timp1</i> – TIMP metalloproteinase inhibitor 1</p> <p><i>Tnfa</i> – Tumor necrosis factor alpha</p> <p><i>Il1a</i> - Interleukin 1a</p> <p><i>Il1b</i> – Interleukin 1b</p> <p><i>Sele</i> – E-selectin</p> <p><i>Selp</i>- P-selectin</p> <p><i>Cxcl1</i> - C-X-C motif chemokine ligand 1</p> <p><i>Cxcl9</i> - C-X-C motif chemokine ligand 9</p> <p><i>Ilr2</i> – Interleukin receptor 2</p> <p><i>Casp6</i> – Caspase 6</p> <p><i>Il10</i> – Interleukin 10</p> <p><i>Ly96</i> – Lymphocyte antigen 96</p> <p><i>Cxcl55</i> - C-X-C motif chemokine ligand 55</p> <p><i>Cxcl3</i> - C-X-C motif chemokine ligand 3</p> <p><i>IL6</i> – Interleukin 6</p> <p><i>Ccl3</i> – C-C motif chemokine ligand 3</p> <p><i>Acod1</i> – Aconitate decarboxylase 1</p> <p><i>Cxcl5</i> - C-X-C motif chemokine ligand 5</p> <p><i>Mmp8</i> – Matrix metalloproteinase 8</p> | <p>(50)</p> |

|                                                                                                                                                                                                                                                                                                                                                                                                                                                                                                                                                             |                                                                                                                                                                                                                                                                                                                                                                                                                                                                                                                                                                                                                                                                                                                                                                                                          |      |
|-------------------------------------------------------------------------------------------------------------------------------------------------------------------------------------------------------------------------------------------------------------------------------------------------------------------------------------------------------------------------------------------------------------------------------------------------------------------------------------------------------------------------------------------------------------|----------------------------------------------------------------------------------------------------------------------------------------------------------------------------------------------------------------------------------------------------------------------------------------------------------------------------------------------------------------------------------------------------------------------------------------------------------------------------------------------------------------------------------------------------------------------------------------------------------------------------------------------------------------------------------------------------------------------------------------------------------------------------------------------------------|------|
| <p><b>Brain upregulated genes:</b> <i>Sele, Selp, Icam1</i></p> <p><b>Brain downregulated genes:</b> <i>Cdh5, Ctnna1, Cldn5, Thb, Vwf, Jam2</i></p> <p><b>Heart upregulated genes:</b> <i>Sele, Vcam1, Selp, Icam1, Serpine1</i></p> <p><b>Heart downregulated genes:</b> <i>Cdh5, Ctnnb1, Ocln, Plau, Thbd</i></p> <p><b>Liver upregulated genes:</b> <i>Sele, Selp, Serpine1</i></p> <p><b>Liver downregulated genes:</b> <i>Cdh5, Ctnd11, Jam2, Jam3, Cldn5, Plat, Tfp1</i></p> <p><b>Lung upregulated genes:</b> <i>Sele, Vcam1, Selp, Serpine1</i></p> | <p><i>Sele</i> – E-selectin</p> <p><i>Selp</i> – P-selectin</p> <p><i>Icam1</i> – Intercellular adhesion molecule 1</p> <p><i>Cdh5</i> – Cadherin 5</p> <p><i>Ctnna1</i> – Catenin alpha 1</p> <p><i>Cldn5</i> – Claudin 5</p> <p><i>Lyd6</i> – Lymphocyte antigen 6 complex</p> <p><i>Vwf</i> – von Willebrand factor</p> <p><i>Jam2</i> – Junctional adhesion molecule 2</p> <p><i>Vcam1</i> – Vascular cell adhesion molecule 1</p> <p><i>Serpine1</i> – Serpin family E member 1</p> <p><i>Ctnnb1</i> – Catenin beta 1</p> <p><i>Ocln</i> - Occludin</p> <p><i>Plau</i> – Plasminogen activator urokinase</p> <p><i>Thbd</i> - Thrombomodulin</p> <p><i>Ctnd11</i> - Catenin delta 11</p> <p><i>Jam3</i> – Junctional adhesion molecule 3</p> <p><i>Plat</i> – Plasminogen activator tissue type</p> | (51) |
| <p><b>Adrenal upregulated genes:</b> <i>Csf3, Ccl2, Cxcl10, Selp, Sele, Vcam1, Pdgf, Il6, Ifit2, Ifit3</i></p> <p><b>Adrenal downregulated genes:</b> <i>Rapsn, Dsc2, Zc4gz, Kcnn1, Pcdh12, Kcnn1, Shh, Dapk2</i></p>                                                                                                                                                                                                                                                                                                                                       | <p><i>Csf3</i> – Colony stimulating factor 3</p> <p><i>Ccl2</i> – C-C motif chemokine ligand 2</p> <p><i>Cxcl10</i> – C-X-C motif chemokine ligand 10</p> <p><i>Selp</i> – P-selectin</p> <p><i>Sele</i> – E-selectin</p> <p><i>Vcam1</i> - Vascular cell adhesion molecule 1</p> <p><i>Pdgf</i> – Platelet derived growth factor</p> <p><i>Il6</i> – Interleukin 6</p>                                                                                                                                                                                                                                                                                                                                                                                                                                  | (52) |

|                                                                                                                                          |                                                                                                                                                                                                                                                                                                                                                                                                                                                                                                                                                                                                                                                                                                                                                                                                         |      |
|------------------------------------------------------------------------------------------------------------------------------------------|---------------------------------------------------------------------------------------------------------------------------------------------------------------------------------------------------------------------------------------------------------------------------------------------------------------------------------------------------------------------------------------------------------------------------------------------------------------------------------------------------------------------------------------------------------------------------------------------------------------------------------------------------------------------------------------------------------------------------------------------------------------------------------------------------------|------|
|                                                                                                                                          | <p><i>Ifit2</i> – Interferon induced protein with tetratricopeptide repeats 2</p> <p><i>Ifit3</i> - Interferon induced protein with tetratricopeptide repeats 3</p> <p><i>Rapsn</i> – Receptor associated protein of the synapse</p> <p><i>Dsc2</i> – Desmocollin 2</p> <p><i>Pcdh12</i> – Protocadherin 12</p> <p><i>Kcnb1</i> – Potassium voltage-gated channel subfamily B member 1</p> <p><i>Shh</i> – Sonic hedgehog signaling molecule</p> <p><i>Dapk2</i> – Death associated protein kinase 2</p>                                                                                                                                                                                                                                                                                                |      |
| <p><b>Lung upregulated genes:</b> <i>Gpihbp1, Ifi47, Plvap, Sox17, Atf3, Nrp1, Nusap1, Birc5, Cdk1, Top2a, Kitl, Kdr, Atf3, Cd34</i></p> | <p><i>Gpihbp1</i> – Glycosylphosphatidylinositol anchored high density lipoprotein binding protein 1</p> <p><i>Ifi47</i> – Interferon gamma inducible protein 47</p> <p><i>Plvap</i> – Plasmalemma vesicle associated protein</p> <p><i>Sox17</i> – SRY-box transcription factor 17</p> <p><i>Atf3</i> – Activating transcription factor 3</p> <p><i>Nrp1</i> – Neuropilin 1</p> <p><i>Nusap1</i> – Nucleolar and spindle associated protein 1</p> <p><i>Birc5</i> – Baculoviral IAP repeat containing 5</p> <p><i>Cdk1</i> – Cyclin dependent kinase 1</p> <p><i>Top2a</i> – DNA topoisomerase II alphe</p> <p><i>Kitl</i> – Kit ligang</p> <p><i>Kdr</i> – Kinase insert domain receptor</p> <p><i>Atf3</i> – Activating transcription factor 3</p> <p><i>Cd34</i> -Cluster of differentiation 34</p> | (53) |
| <p><b>Brain upregulated genes:</b> <i>Nectin3, Cxcl1,</i></p>                                                                            | <p><i>Nectin 3</i> – Nectin cell adhesion molecule 3</p>                                                                                                                                                                                                                                                                                                                                                                                                                                                                                                                                                                                                                                                                                                                                                | (55) |

|                                                                                                      |                                                                                                                                                                                                                                                                                                                                                                                                                                                                                                                                                                                                                                                                                                                                                 |  |
|------------------------------------------------------------------------------------------------------|-------------------------------------------------------------------------------------------------------------------------------------------------------------------------------------------------------------------------------------------------------------------------------------------------------------------------------------------------------------------------------------------------------------------------------------------------------------------------------------------------------------------------------------------------------------------------------------------------------------------------------------------------------------------------------------------------------------------------------------------------|--|
| <p><i>Cxcl2, Cxcl16, Ccl2, Ccr12, C3ar1, Actb, Tlr4, Tlr13</i></p>                                   | <p><i>Cxcl1</i> - Chemokine (C-X-C motif) ligand 1<br/> <i>Cxcl2</i> - Chemokine (C-X-C motif) ligand 2<br/> <i>Cxcl16</i> - Chemokine (C-X-C motif) ligand 16<br/> <i>Ccl2</i> - Chemokine (C-X-C motif) ligand 2<br/> <i>Ccr12</i> - Chemokine (C-C motif) ligand 2<br/> <i>C3ar1</i> - Complement component 3a receptor<br/> <i>Actb</i>, - Actin, beta<br/> <i>Tlr4</i> - Toll like receptor 4<br/> <i>Tlr13</i> - Toll like receptor 13<br/> <i>Cdh5</i> - Cadherin 5<br/> <i>Cdh24</i> - Cadherin 24<br/> <i>Pcdh1</i> - Protocadherin 1<br/> <i>Pcdhgc3</i> - Protocadherin gamma-C3<br/> <i>Nectin1</i> - Nectin cell adhesion molecule 1<br/> <i>Nectin2</i> - Nectin cell adhesion molecule 2<br/> <i>Actn1</i> - Alpha actinin 1</p> |  |
| <p><b>Brain downregulated genes:</b> <i>Cdh5, Cdh24, Pcdh1, Pcdhgc3, Nectin1, Nectin2, Actn1</i></p> |                                                                                                                                                                                                                                                                                                                                                                                                                                                                                                                                                                                                                                                                                                                                                 |  |
