# Supplementary material for: Omics of endothelial cell dysfunction in sepsis
Source: PubMed Central journal article supplement — Vasc Biol. 2022 Apr 7;4(1):R15–34. doi: 10.1530/VB-22-0003 (PMC9066943; doi:10.1530/vb-22-0003), 2022-04-07
Supplement: supplementary_table_3.pdf [file supplementary_table_3.pdf]

**Table S3:** Definitions for each of the proteins listed in Table 3. More detail on the functionality of these proteins can be found at <https://www.uniprot.org>, <https://www.ncbi.nlm.nih.gov> or

| <b>Proteins Upregulated/Downregulated</b>                                            | <b>Protein Name</b>                                                                                                                                                                                                                                                                                                                                        | <b>Reference</b> |
|--------------------------------------------------------------------------------------|------------------------------------------------------------------------------------------------------------------------------------------------------------------------------------------------------------------------------------------------------------------------------------------------------------------------------------------------------------|------------------|
| <b>Liver upregulated proteins:</b> SAA1, VCAM1, CXCL9                                | SAA1 – Serum amyloid A1<br>VCAM1 – Vascular cell adhesion molecule 1                                                                                                                                                                                                                                                                                       | (56)             |
| <b>Liver downregulated proteins:</b> HPGD, APOE, MUP3                                | CXCL9 – C-X-C motif chemokine ligand 9                                                                                                                                                                                                                                                                                                                     |                  |
| <b>Kidney upregulated proteins:</b> SAA1, SAA2, HP, FGB, ITIH3                       | HPGD – 15-hydroxyprostaglandin dehydrogenase                                                                                                                                                                                                                                                                                                               |                  |
| <b>Kidney downregulated proteins:</b> RBP4, HDLBP                                    | APOE – Apolipoprotein E<br>MUP3 – Major urinary protein 3                                                                                                                                                                                                                                                                                                  |                  |
| <b>Heart upregulated proteins:</b> SAA2, VCAM1, HP, ORM2, PDK4                       | SAA2 – Serum amyloid A2                                                                                                                                                                                                                                                                                                                                    |                  |
| <b>Heart downregulated proteins:</b> TTR, C8, VCAN                                   | HP - Haptoglobin<br>FGB – Fibrinogen beta chain                                                                                                                                                                                                                                                                                                            |                  |
| <b>Brain upregulated protein:</b> HP, ITIH4, CFB, CP, HPX                            | ITIH3 – Inter-alpha-trypsin inhibitor heavy chain 3                                                                                                                                                                                                                                                                                                        |                  |
| <b>White adipose tissue (WAT) upregulated proteins:</b> ORM2, ITIH4, HP, CFB, VCAM1, | RBP4 – Retinol binding protein 4<br>HDLBP – High density lipoprotein binding protein                                                                                                                                                                                                                                                                       |                  |
| <b>WAT downregulated proteins:</b> LRPAP1, VCAN                                      | ORM2 – Orosomuroid 2<br>PDK4 – Pyruvate dehydrogenase kinase 4<br>TTR - Transthyretin<br>C8 – Complement component 8<br>VCAN - Versican<br>ITIH4 – Inter-alpha-trypsin inhibitor heavy chain 4<br>CFB – Complement factor B<br>CP - Ceruloplasmin<br>HPX - Hemopexin<br>ORM2 – Orosomuroid 2<br>LRPAP1 – KDK receptor related protein associated protein 1 |                  |

|                                                                                                                                                                                                                                                                                                           |                                                                                                                                                                                                                                                                                                                                                                                                                                                                                                                                                                                                                                                              |             |
|-----------------------------------------------------------------------------------------------------------------------------------------------------------------------------------------------------------------------------------------------------------------------------------------------------------|--------------------------------------------------------------------------------------------------------------------------------------------------------------------------------------------------------------------------------------------------------------------------------------------------------------------------------------------------------------------------------------------------------------------------------------------------------------------------------------------------------------------------------------------------------------------------------------------------------------------------------------------------------------|-------------|
| <p><b>Lung upregulated proteins:</b> C1QA, C4BP, FGA, FGG, C4B, SERPINA6, C3, CFB</p> <p><b>Lung downregulated proteins:</b> COL5A1, GNAI1, ATP8, MLST8, POSTN, TH, ST3GAL1, POLR2M</p>                                                                                                                   | <p>C1QA – Complement C1qA chain</p> <p>C4BP – Complement component 4 binding protein</p> <p>FGA – Fibrinogen alpha chain</p> <p>FGG – Fibrinogen gamma chain</p> <p>C4B – Complement C4B</p> <p>SERPINA6 – Serpin family A member 6</p> <p>C3 – Complement component 3</p> <p>CFB – Complement factor B</p> <p>COL5A1 – Collagen type V 1 chain</p> <p>GNAI1 – G protein subunit alpha i1</p> <p>ATP8 – ATP synthase F0 subunit 8</p> <p>MLST8 – MTOR associated protein, LST8</p> <p>POSTN - Periostin</p> <p>TH – Tyrosine hydroxylase</p> <p>ST3GAL1 – ST3 beta-galactoside alpha-2,3-sialyltransferase 1</p> <p>POLR2M – RNA polymerase II subunit M</p> | <p>(57)</p> |
| <p><b>ECs upregulated proteins:</b> SAA1, HX/SHH and HPX</p> <p><b>ECs downregulated proteins:</b> CLU, AZGP1, C6, CFD, TLN1, GSN, F10</p> <p><b>Glycocalyx downregulated proteins:</b> APOB, C3, CFH, TLN1, C7, SPP2</p> <p><b>Vascular smooth muscle downregulated proteins:</b> GC, F12, C8, APOA4</p> | <p>SAA1 – Serum amyloid A1</p> <p>SHH – Sonic hedgehog</p> <p>HPX - Hemopexin</p> <p>CLU - Clusterin</p> <p>AZGP1 – Alpha-2-glycoprotein 1, zinc-binding</p> <p>C6 – Complement component 6</p> <p>CFD – Complement factor D</p> <p>TLN1 – Talin 1</p> <p>GSN - Gelsolin</p>                                                                                                                                                                                                                                                                                                                                                                                 | <p>(58)</p> |

|                                                                                                                                                                                                                                                                                                                                                    |                                                                                                                                                                                                                                                                                                                                                                                                                                                                                                                                                                                                                                                                                        |             |
|----------------------------------------------------------------------------------------------------------------------------------------------------------------------------------------------------------------------------------------------------------------------------------------------------------------------------------------------------|----------------------------------------------------------------------------------------------------------------------------------------------------------------------------------------------------------------------------------------------------------------------------------------------------------------------------------------------------------------------------------------------------------------------------------------------------------------------------------------------------------------------------------------------------------------------------------------------------------------------------------------------------------------------------------------|-------------|
|                                                                                                                                                                                                                                                                                                                                                    | <p>F10 – Coagulation factor X</p> <p>APOB – Apolipoprotein B</p> <p>C3 – Complement component 3</p> <p>CFH – Complement factor H</p> <p>C7 – Complement component 7</p> <p>SPP2 – Secreted phosphoprotein 2</p> <p>GC – GC vitamin D binding protein</p> <p>F12 – Coagulation factor 12</p> <p>C8 – Complement component 8</p> <p>APOA4 – Apolipoprotein A4</p>                                                                                                                                                                                                                                                                                                                        |             |
| <p><b>Heart upregulated proteins:</b> ICAM2, ITGB3, HSPA12b, THBS1, TUBA1A, TUBA4A, MCAM</p> <p><b>Heart downregulated proteins:</b> VWF, ICAM1, DLAT, NCL, VCP, FH1, LMNB2</p> <p><b>Heart upregulated proteins:</b> CDH13, GDI2, DYNC1H1, CLTC</p> <p><b>Heart downregulated proteins:</b> ACADM, ACTB, CALD1, DES, ECI1, MSN, PRKCDBP, TPM1</p> | <p>ICAM2 – Intercellular adhesion molecule 2</p> <p>ITGB3 – Integrin subunit beta 3</p> <p>HSPA12b – Heat shock protein family A member 12B</p> <p>THBS1 – Thrombospondin 1</p> <p>TUBA1A – Tubulin alpha 1a</p> <p>TUBA4A - Tubulin alpha 4a</p> <p>MCAM – Melanoma cell adhesion molecule</p> <p>VWF – von Willebrand factor</p> <p>ICAM1 – Intercellular adhesion molecule 1</p> <p>DLAT – Dihydrolipoamide S-acetyltransferase (E2 component of pyruvate dehydrogenase complex)</p> <p>NCL - Nucleolin</p> <p>VCP – Valosin containing protein</p> <p>FH1 – Fumarate hydratase 1</p> <p>LMNB2 – Lamin B2</p> <p>CDH13 – Cadherin 13</p> <p>GDI2 – GDP dissociation inhibitor 2</p> | <p>(59)</p> |

|                                                                                                                                                                       |                                                                                                                                                                                                                                                                                                                                                                                                                                                                                                                                                      |      |
|-----------------------------------------------------------------------------------------------------------------------------------------------------------------------|------------------------------------------------------------------------------------------------------------------------------------------------------------------------------------------------------------------------------------------------------------------------------------------------------------------------------------------------------------------------------------------------------------------------------------------------------------------------------------------------------------------------------------------------------|------|
|                                                                                                                                                                       | <p>DYNC1H1 – Dynein cytoplasmic 1 heavy chain 1</p> <p>CLTC – Clathrin heavy chain</p> <p>ACADM – Acyl-CoA dehydrogenase medium chain</p> <p>ACTB – Actin beta</p> <p>CALD1 – Caldesmon 1</p> <p>DES - Desmin</p> <p>ECI1 – Enoyl-CoA delta isomerase 1</p> <p>MSN - Moesin</p> <p>PRKCDBP – Protein kinase C delta binding protein</p> <p>TPM1 – Tropomyosin 1</p>                                                                                                                                                                                  |      |
| <p><b>Lung upregulated proteins:</b> GBP2, ISG15, H2D1, SERPINB2, B2M, CASP7</p> <p><b>Lung downregulated proteins:</b> FADS1, GBE1, DNPH1, MLYCD, FAM120C, ALDOC</p> | <p>GBP2 – Guanylate binding protein 2</p> <p>ISG15 – ISG15 ubiquitin like modifier</p> <p>H2-D1 – Histocompatibility 2, D region locus 1</p> <p>SERPINB2 – Serpin family B member 2</p> <p>B2M – Beta-2-microglobulin</p> <p>CASP7 - Caspase 7</p> <p>FADS1 – Fatty acid desaturase 1</p> <p>GBE1 – 1,4-alpha-glucan branching enzyme 1</p> <p>DNPH1 – 2'-deixynucleoside 5'phosphate N-hydrolase</p> <p>MLYCD – Malonyl-CoA decarboxylase</p> <p>FAM120C – Family with sequence similarity 120C</p> <p>ALDOC – Aldolase, fructose-biphosphate C</p> | (60) |

|                                                                                                                                                                                    |                                                                                                                                                                                                                                                                                                                                                                                                                                                                                                                                                                                                                                                                                    |             |
|------------------------------------------------------------------------------------------------------------------------------------------------------------------------------------|------------------------------------------------------------------------------------------------------------------------------------------------------------------------------------------------------------------------------------------------------------------------------------------------------------------------------------------------------------------------------------------------------------------------------------------------------------------------------------------------------------------------------------------------------------------------------------------------------------------------------------------------------------------------------------|-------------|
| <p><b>Lung upregulated proteins:</b><br/>SERPINB1A, ANXA1, S100A9</p>                                                                                                              | <p>SERPINB1A – Serine (or cysteine) peptidase inhibitor, clade B, member 1a</p> <p>ANXA1 – Annexin A1</p> <p>S100A9 – S100 calcium binding protein A9</p>                                                                                                                                                                                                                                                                                                                                                                                                                                                                                                                          | <p>(61)</p> |
| <p><b>Brain upregulated proteins:</b> VCAM1, JAMA, PD11, CJUN, CCL2, CCL5, CXCR5, CCL2</p> <p><b>Brain downregulated proteins:</b> TPST1, SNRPC, COBL, MMP15, CD9, BRD3, LRIG1</p> | <p>VCAM1 – Vascular cell adhesion molecule 1</p> <p>JAMA – Junctional adhesion molecule A</p> <p>PD11 – Programmed cell death 1 ligand 1</p> <p>CJUN – c jun proto-oncogene</p> <p>CCL2 – C-C motif chemokine ligand 2</p> <p>CCL5 - C-C motif chemokine ligand 5</p> <p>CXCR5 – C-X-C motif chemokine receptor 5</p> <p>TPST1 – Tyrosylprotein sulfotransferase 1</p> <p>SNRPC – Small nuclear ribonucleoprotein polypeptide C</p> <p>COBL – Cordon-bleu WH2 repeat protein</p> <p>MMP15 – Matrix metalloproteinase 15</p> <p>CD9 - Cluster of differentiation 9</p> <p>BRD3 – Bromodomain containing 3</p> <p>LRIG1 – Leucine rich repeats and immunoglobulin like domains 1</p> | <p>(62)</p> |
